# Supplementary material
Source: JCI journal article supplement (doi:10.1172/jci175501)

# Unedited gel pictures

Full unedited gel for Figure 4A

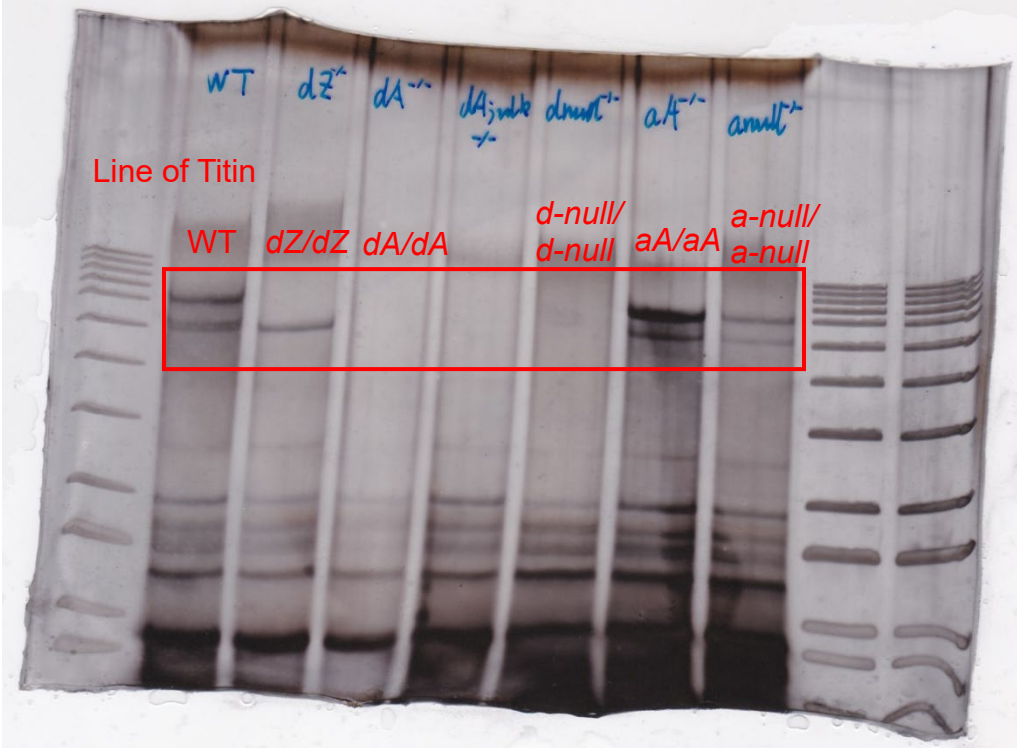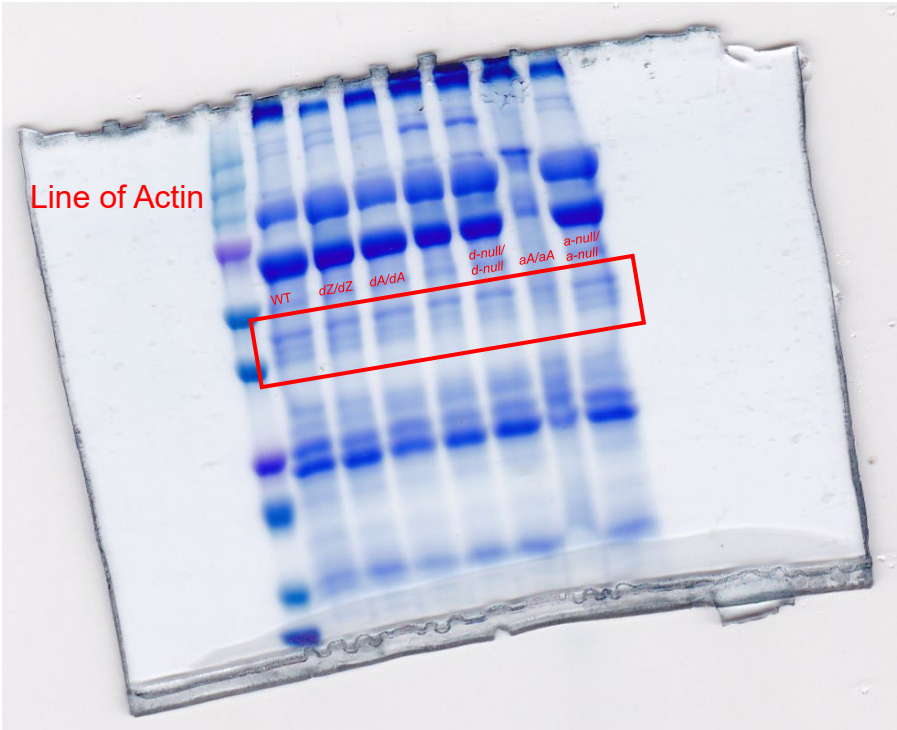

Full unedited gel for Figure 5A

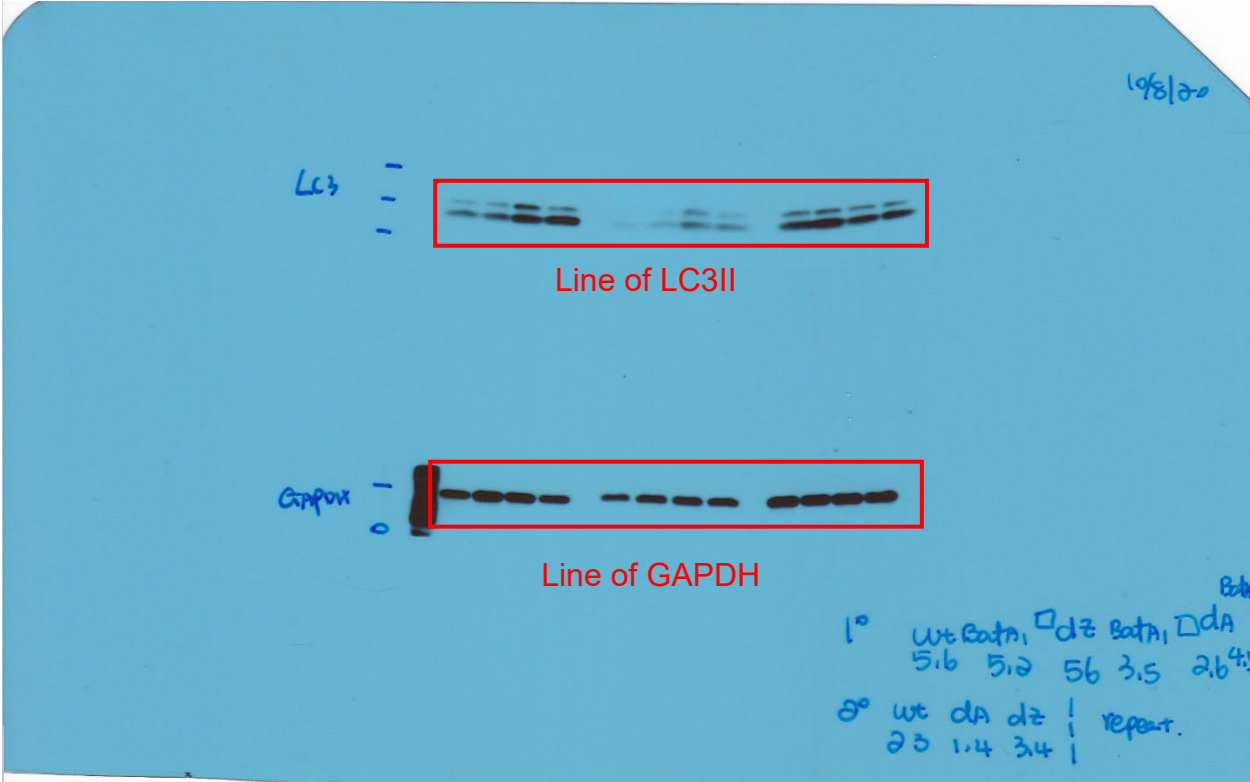

Full unedited gel for Figure 5E

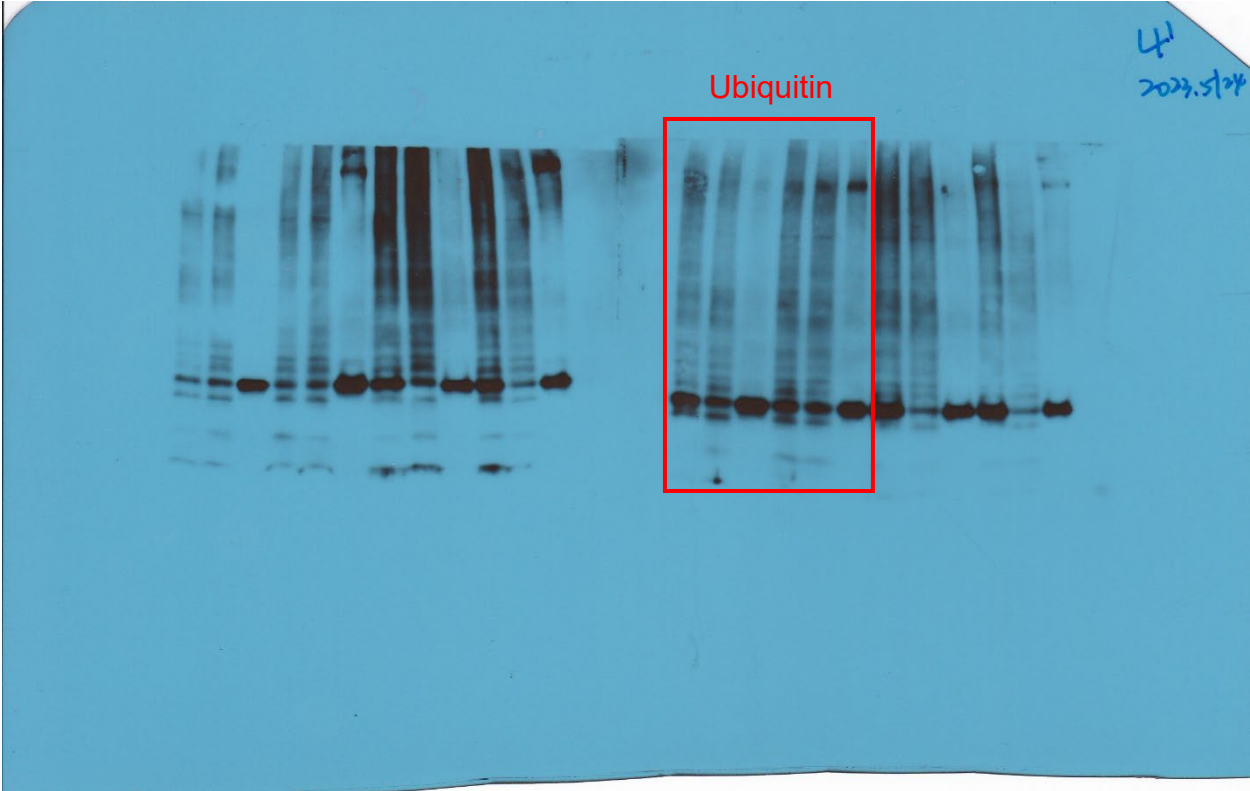

Full unedited gel for Figure 6D: atg7

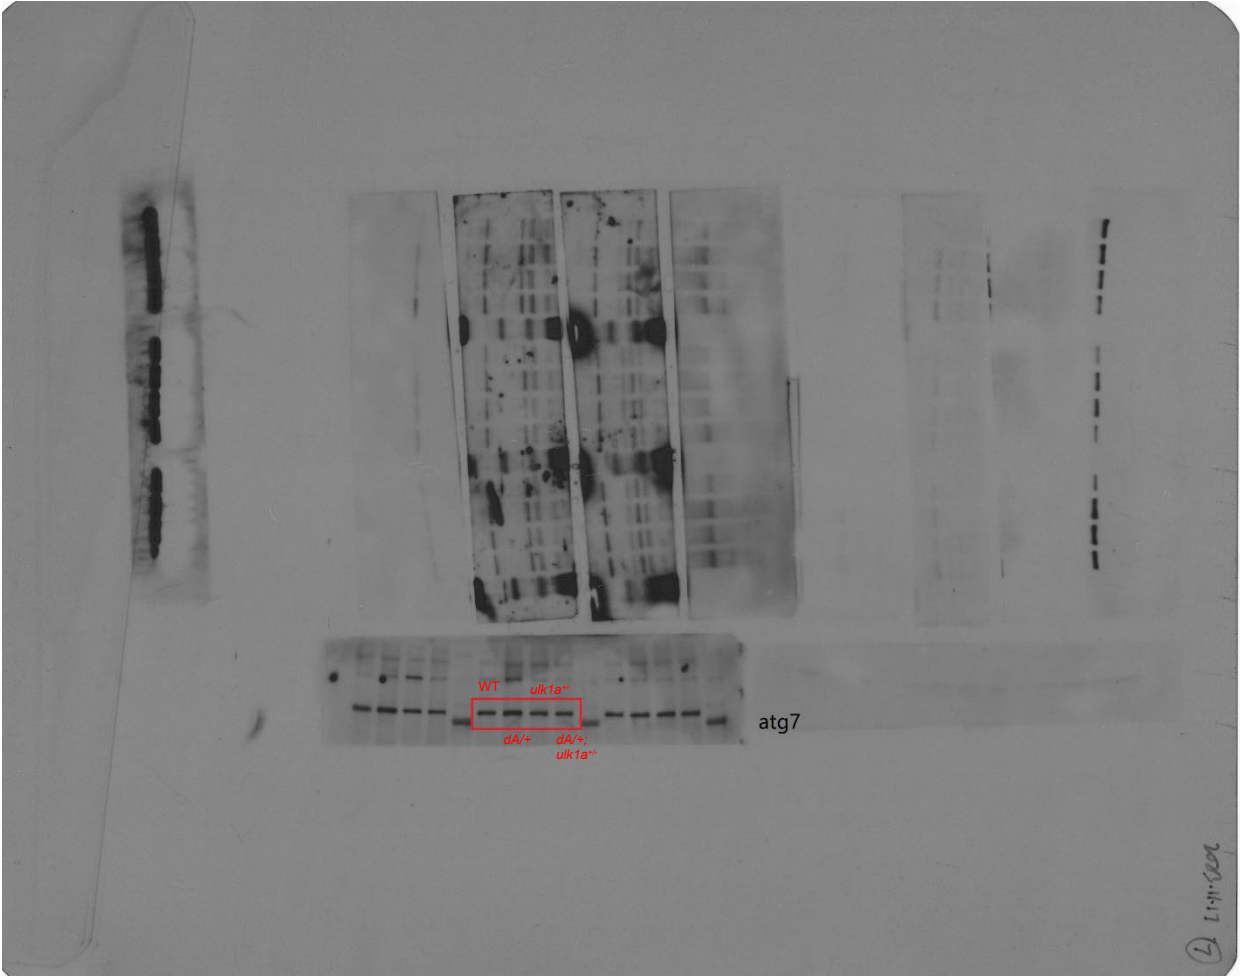

Full unedited gel for Figure 6D: ulk1

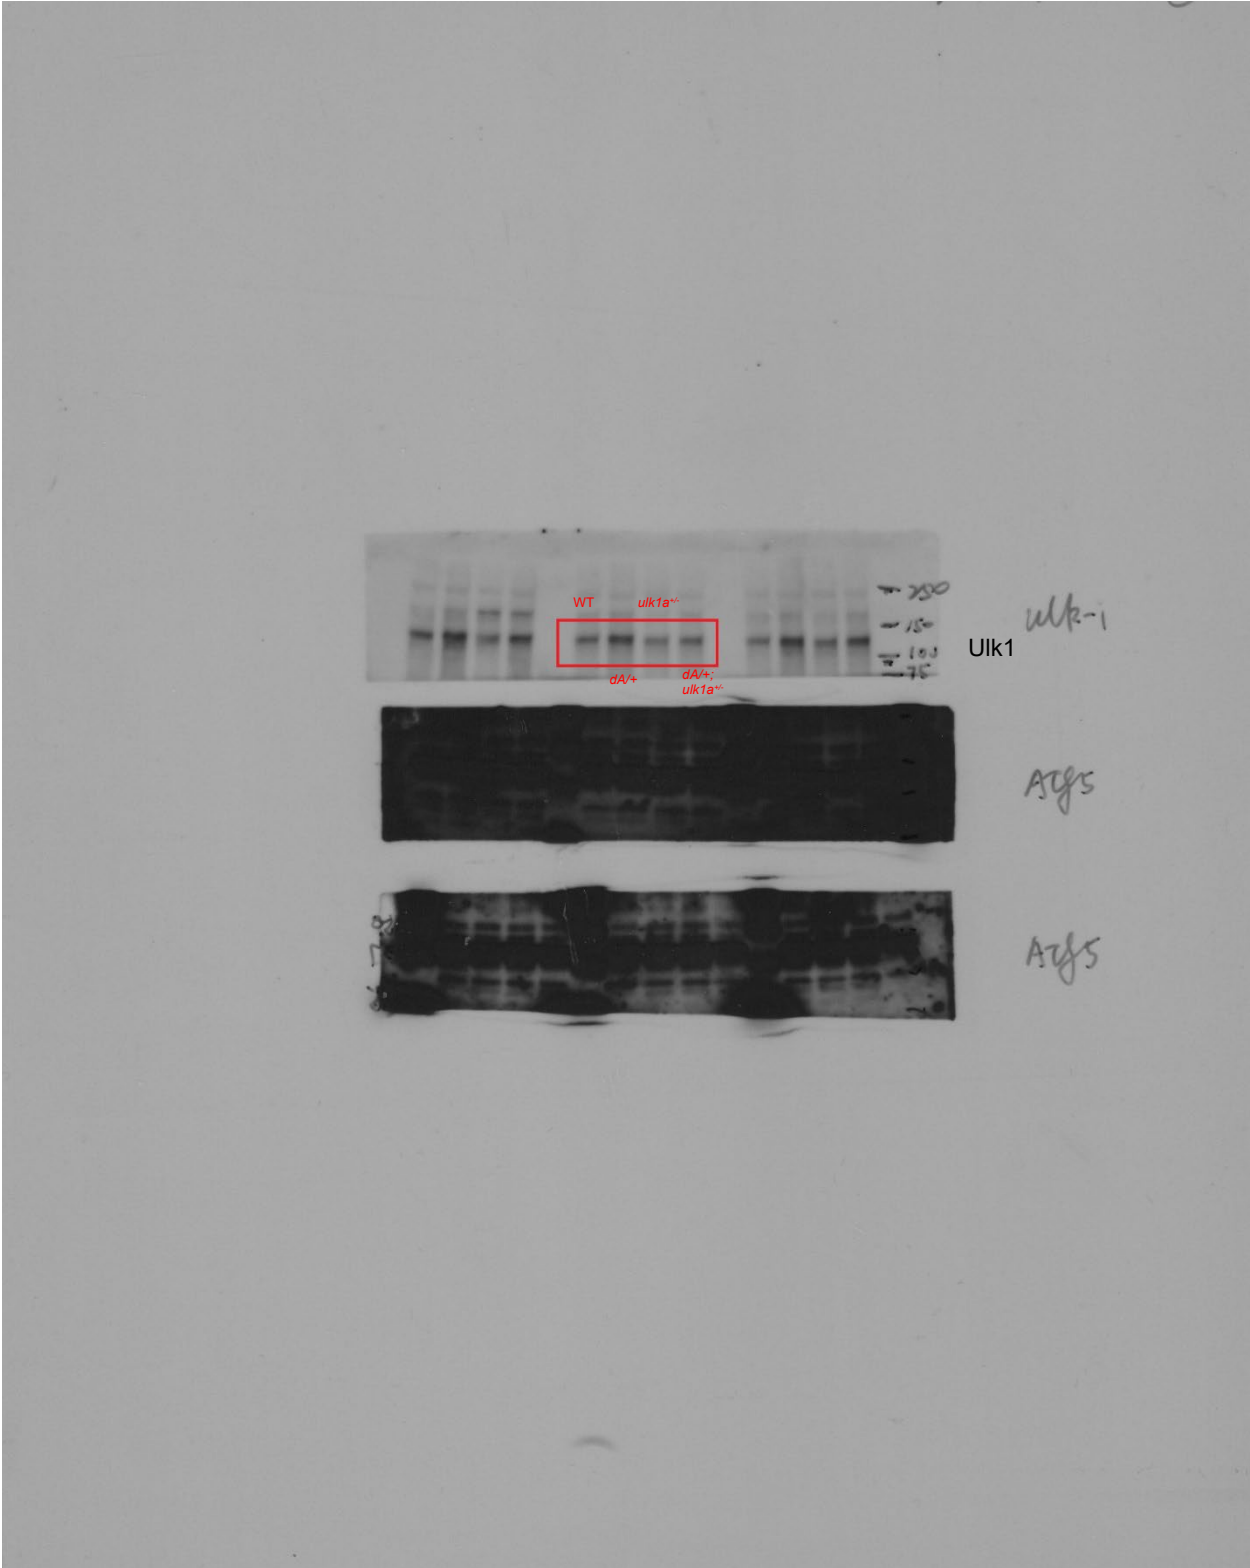

Full unedited gel for Figure 6D: GAPDH

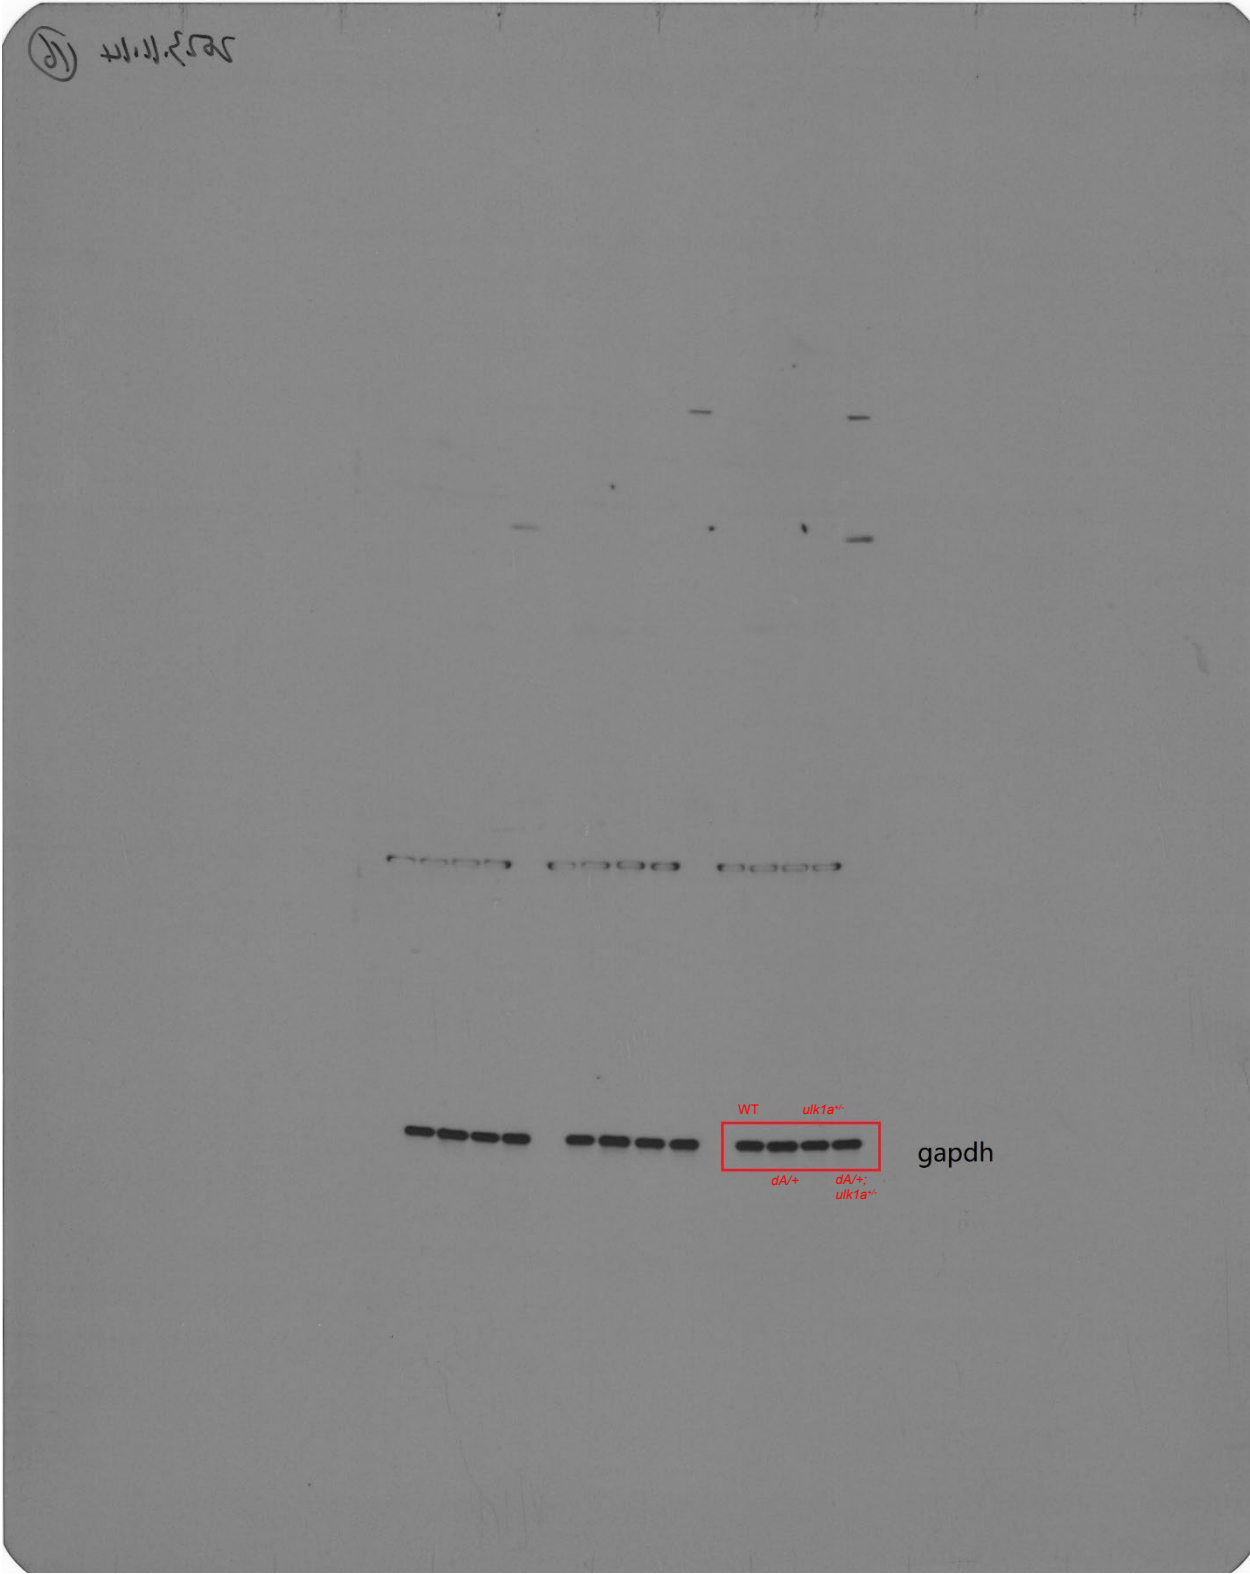

Full unedited gel for Figure 6G

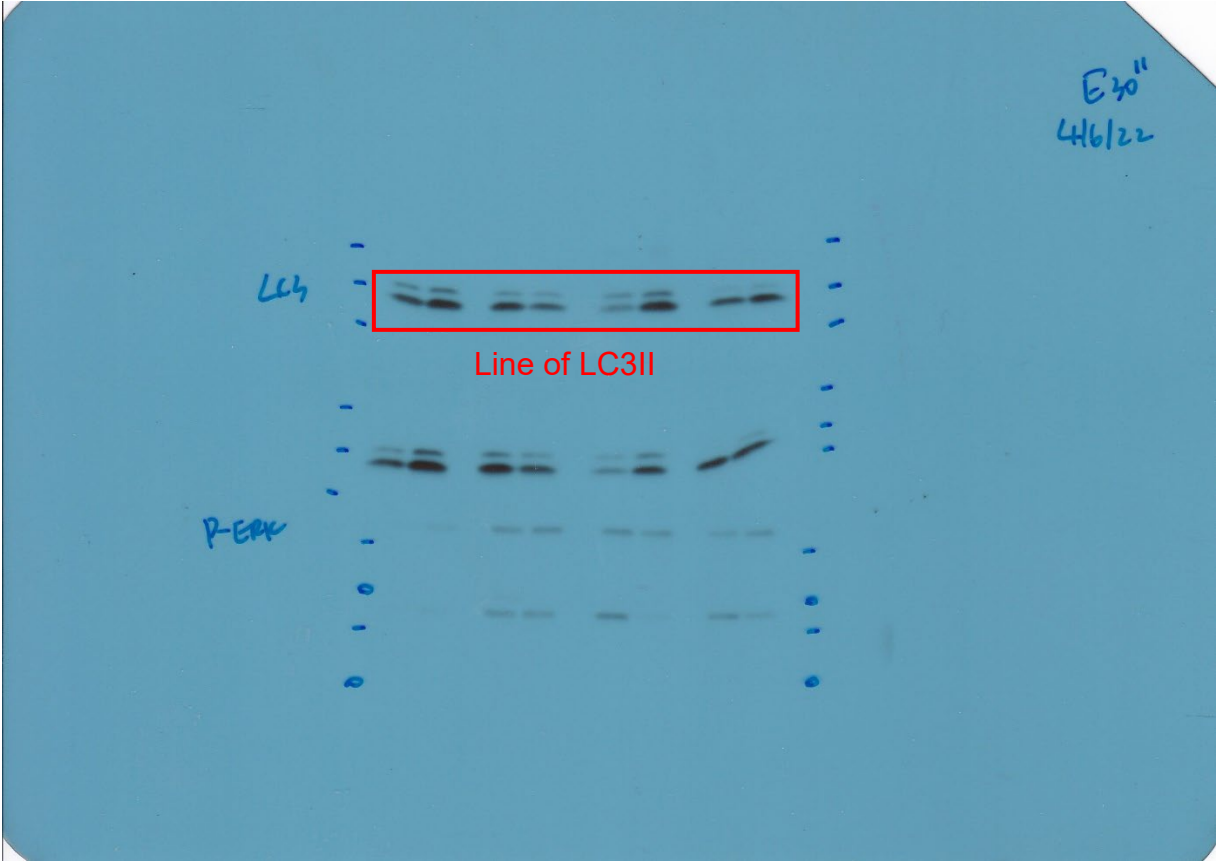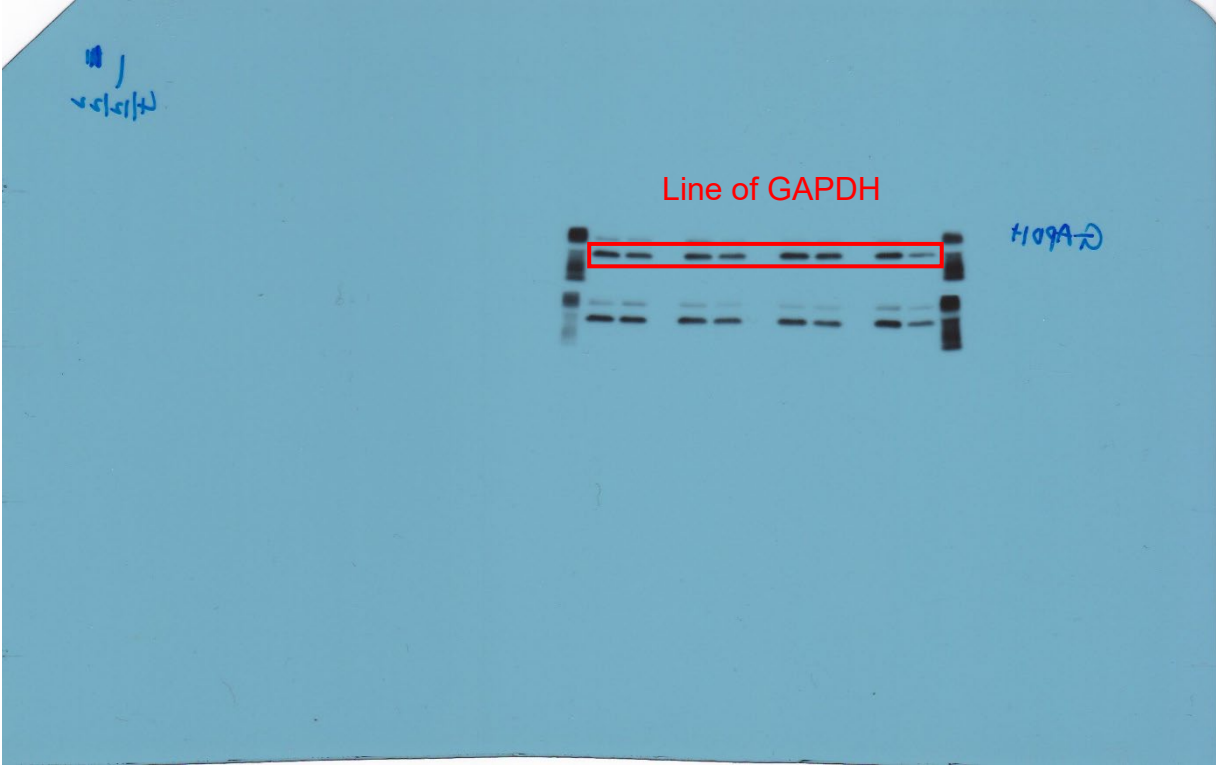

Full unedited gel for Figure S3: Drp1

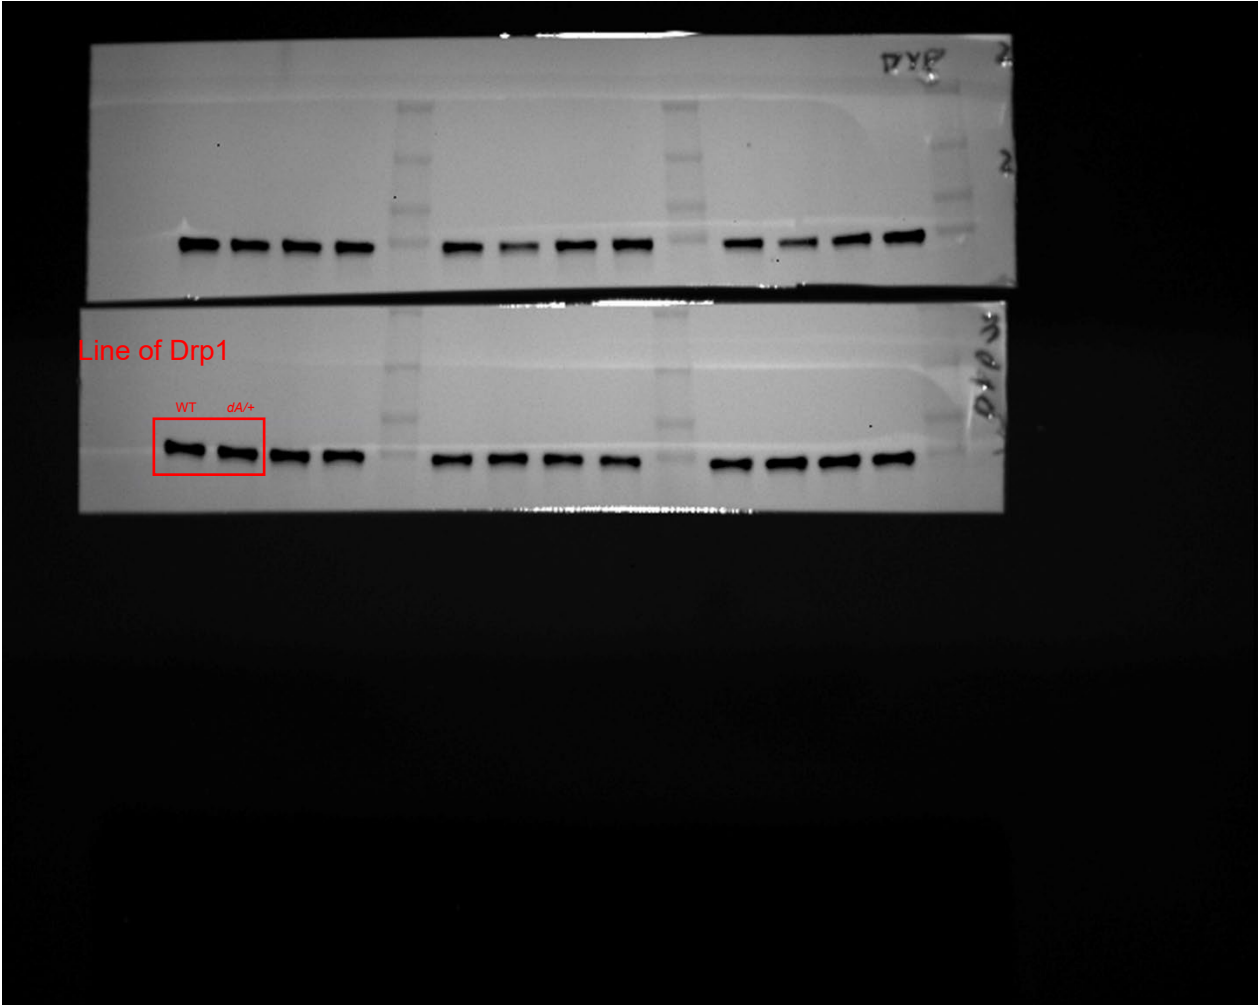



Full unedited gel for Figure S3: Tom20

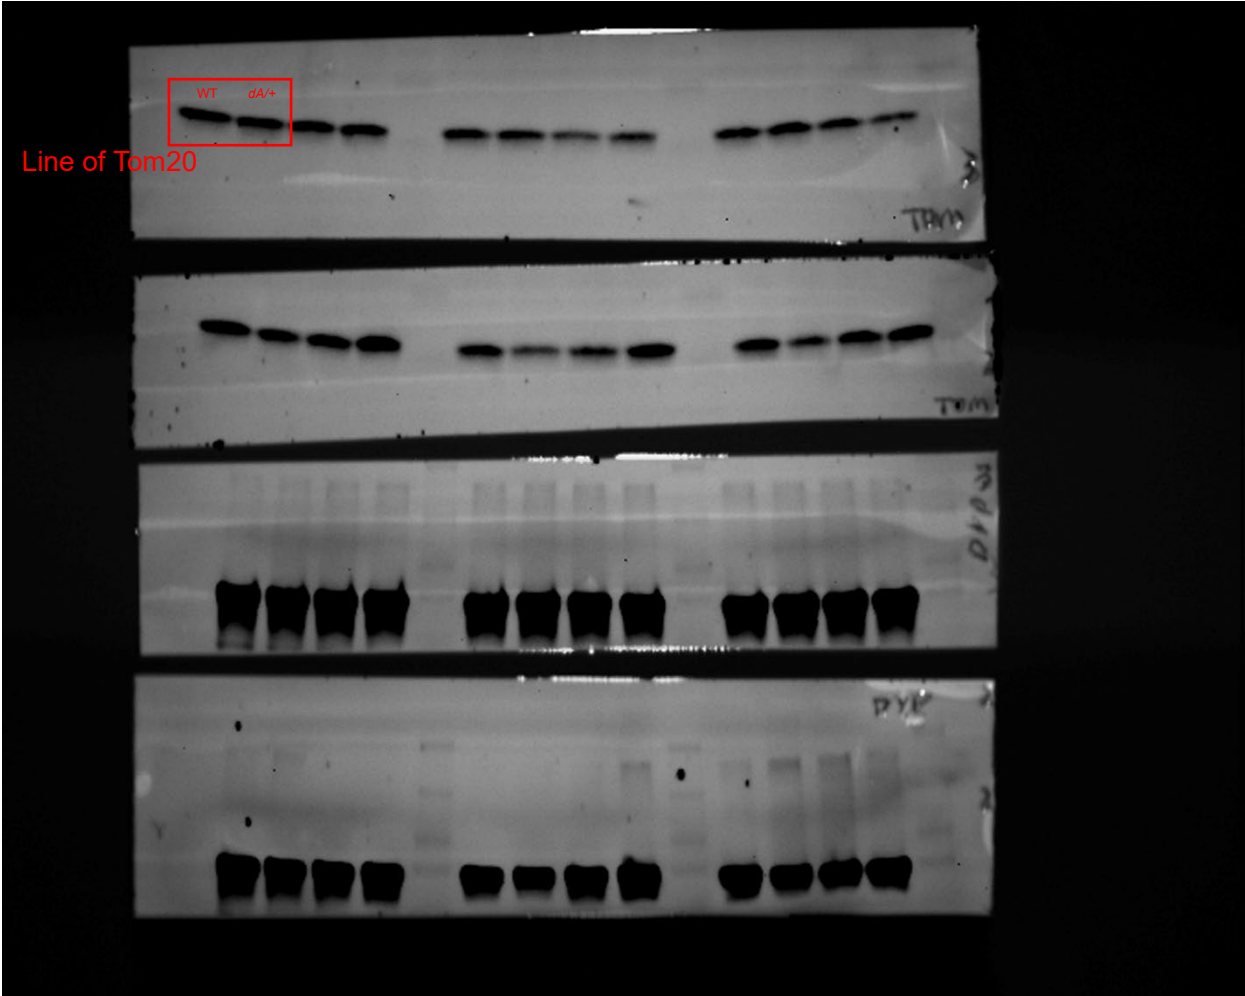

Full unedited gel for Figure S3: GAPDH

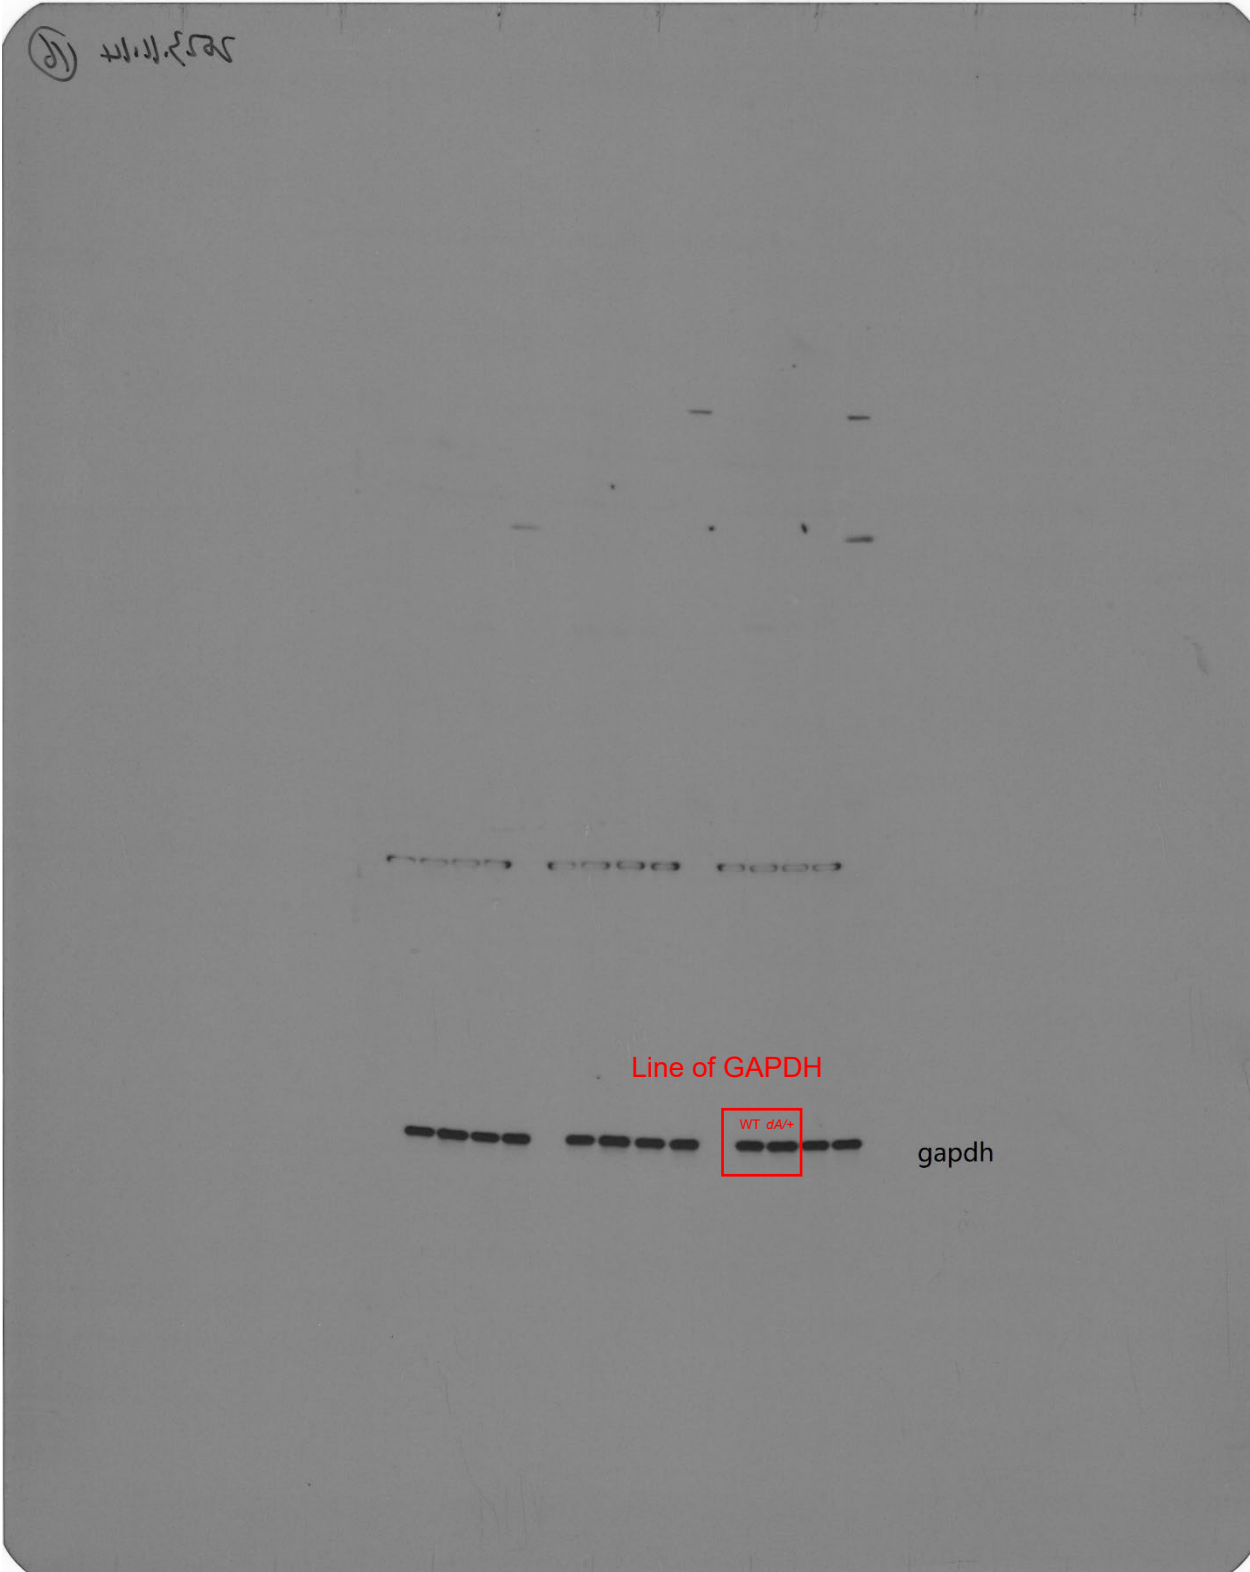

Supplement: sd2 [file 2]
